# Supplementary material for: High resolution genomes of multipleXiphophorusspecies provide new insights into microevolution, hybrid incompatibility, and epistasis
Source: HighWire-hosted journal article supplement (doi:10.1101/gr.277434.122), 2023-04-01
Supplement: Supplemental_Table_S4.xlsx [file Supplemental_Table_S4.xlsx]

## Sheet: Sheet1
Supplemental Table S4. Numbers of heterozygous polymorphisms in each Xiphophorus population
Species	Strain/Population	Average heterozygous polymorphisms
X. maculatus	Jp163A	7281.75
X. maculatus	Jp163B	7473.5
X. maculatus	Wild caught	703959
X. couchianus	XGSC strain	1915.75
X. couchianus	Wurzburg strain	3254
X. hellerii	Sarabia	2.89738e+06
