# Supplementary material for: High resolution genomes of multipleXiphophorusspecies provide new insights into microevolution, hybrid incompatibility, and epistasis
Source: HighWire-hosted journal article supplement (doi:10.1101/gr.277434.122), 2023-04-01
Supplement: Supplemental_Table_S5.xlsx [file Supplemental_Table_S5.xlsx]

## Sheet: Supplemental_Table_S5
Supplemental Table S5. Numbers of coding sequences affected by intra-population polymorphisms
Type	X. maculatus Jp163A	X. maculatus Jp163B	X. maculatus wild	X. hellerii
conservative inframe deletion	79	92	2142	4188
conservative inframe insertion	6	71	4242	6697
synonymous variant	1098	2680	200648	396783
disruptive inframe deletion	59	62	1548	2427
disruptive inframe insertion	9	76	2886	4043
frameshift variant	51	140	3563	7485
missense variant	1118	2887	144819	242649
upstream gene variant	41252	85965	4161106	7792326
